# Supplementary material for: Structure–activity relationship of pyrazol-4-yl-pyridine derivatives and identification of a radiofluorinated probe for imaging the muscarinic acetylcholine receptor M4
Source: PubMed Central journal article supplement — Acta Pharm Sin B. 2022 Jul 21;13(1):213–26. doi: 10.1016/j.apsb.2022.07.008 (PMC9939360; doi:10.1016/j.apsb.2022.07.008), 2022-07-21

## Supporting Information for

### Original article

# Structure–activity relationship of pyrazol-4-yl-pyridine derivatives and identification of a radiofluorinated probe for imaging the muscarinic acetylcholine receptor M<sub>4</sub>

Ahmed Haider<sup>a,†</sup>, Xiaoyun Deng<sup>a,b,†</sup>, Olivia Mastromihalis<sup>c,†</sup>, Stefanie K. Pfister<sup>a</sup>, Troels E. Jeppesen<sup>a</sup>, Zhiwei Xiao<sup>a</sup>, Vi Pham<sup>c,d</sup>, Shaofa Sun<sup>e</sup>, Jian Rong<sup>a</sup>, Chunyu Zhao<sup>a</sup>, Jiahui Chen<sup>a</sup>, Yinlong Li<sup>a</sup>, Theresa R. Connors<sup>f</sup>, April T. Davenport<sup>g</sup>, James B. Daunais<sup>g</sup>, Vahid Hosseini<sup>h</sup>, Wenqing Rani<sup>i</sup>, Arthur Christopoulos<sup>c,d</sup>, Lu Wang<sup>i</sup>, Celine Valant<sup>c,d,\*</sup>, Steven H. Liang<sup>a,\*</sup>

<sup>a</sup>*Department of Radiology, Division of Nuclear Medicine and Molecular Imaging Massachusetts General Hospital and Harvard Medical School, Boston, MA 02114, USA*

<sup>b</sup>*Department of Nuclear Medicine, Tongji Hospital, Tongji Medical College, Huazhong University of Science and Technology, Wuhan 430030, China*

<sup>c</sup>*Drug Discovery Biology, Monash Institute of Pharmaceutical Sciences, Monash University, Parkville, VIC 3052, Australia*

<sup>d</sup>*Neuromedicines Discovery Centre, Monash Institute of Pharmaceutical Sciences, Monash University, Parkville VIC 3052, Australia*

<sup>e</sup>*Hubei Collaborative Innovation Centre for Non-power Nuclear Technology, College of Nuclear Technology & Chemistry and Biology, Hubei University of Science and Technology, Xianning 437100, China*

<sup>f</sup>*Department of Neurology, Massachusetts General Hospital, Harvard Medical School, Boston, MA 02114, USA*

<sup>g</sup>*Department of Physiology and Pharmacology, Wake Forest School of Medicine, Winston Salem, NC 27157, USA*

<sup>h</sup>*Terasaki Institute for Biomedical Innovation (TIBI), Los Angeles, CA 90024, USA*

<sup>i</sup>*Center of Cyclotron and PET Radiopharmaceuticals, Department of Nuclear Medicine and PET/CT-MRI Center, the First Affiliated Hospital of Jinan University, Guangzhou 510630, China*

Received 22 January 2022; received in revised form 13 May 2022; accepted 22 June 2022

\*Corresponding authors. Tel./fax: +1 617 230 5491.

E-mail addresses: [liang.steven@mgh.harvard.edu](mailto:liang.steven@mgh.harvard.edu) (Steven H. Liang).

Running title: Imaging muscarinic acetylcholine receptor M<sub>4</sub>

# $^1\text{H}$ spectrum of compound 2

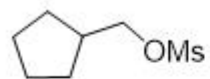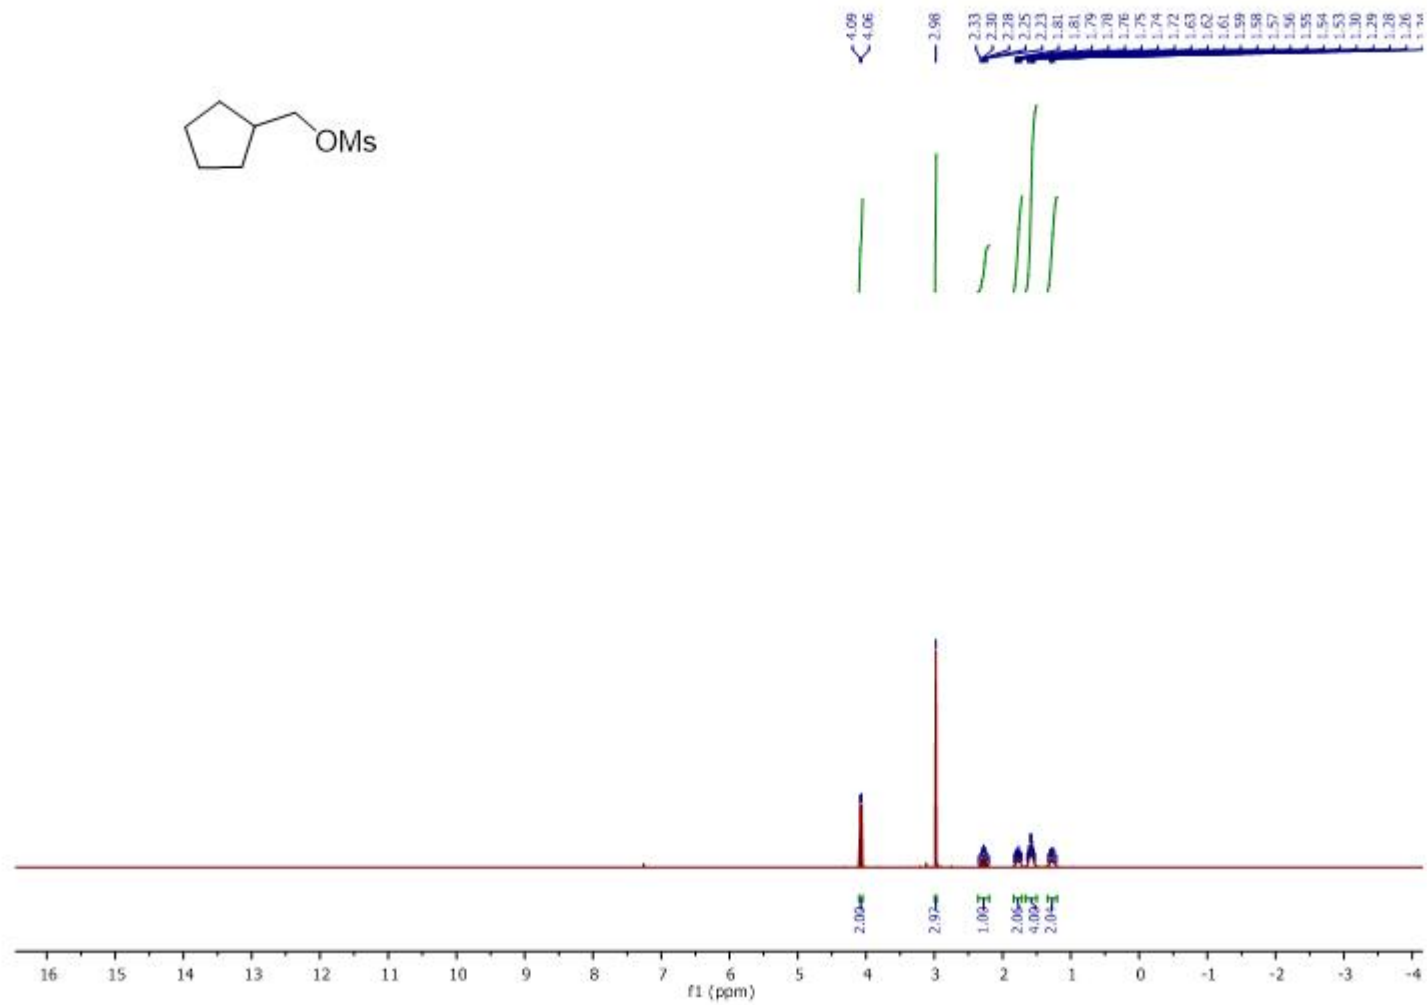

# <sup>1</sup>H spectrum of compound 4

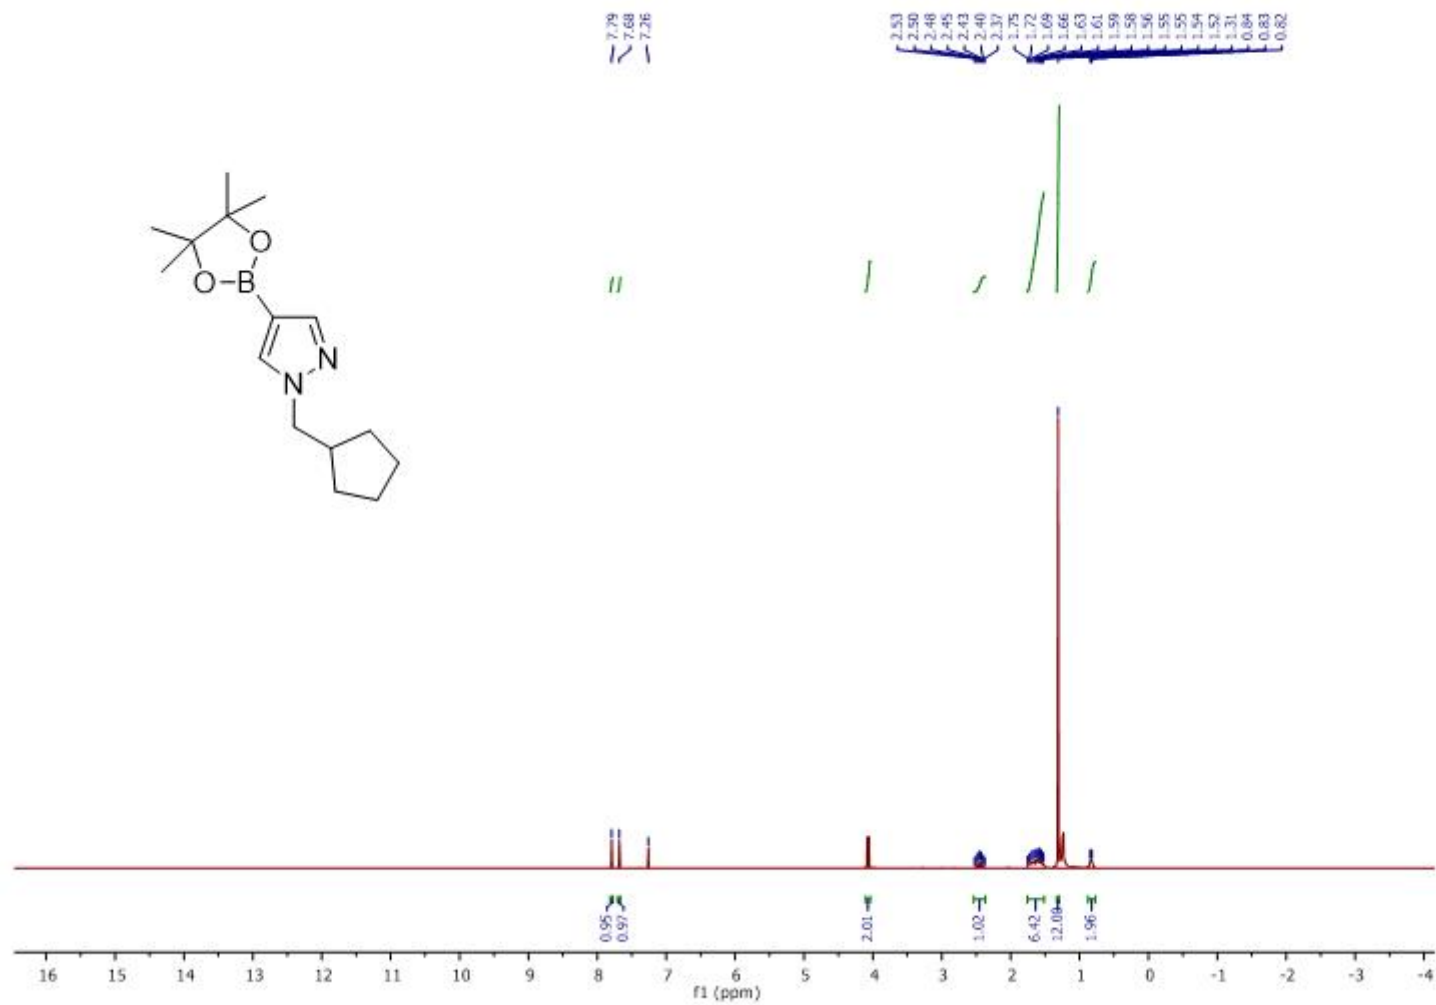

# <sup>13</sup>C spectrum of compound 4

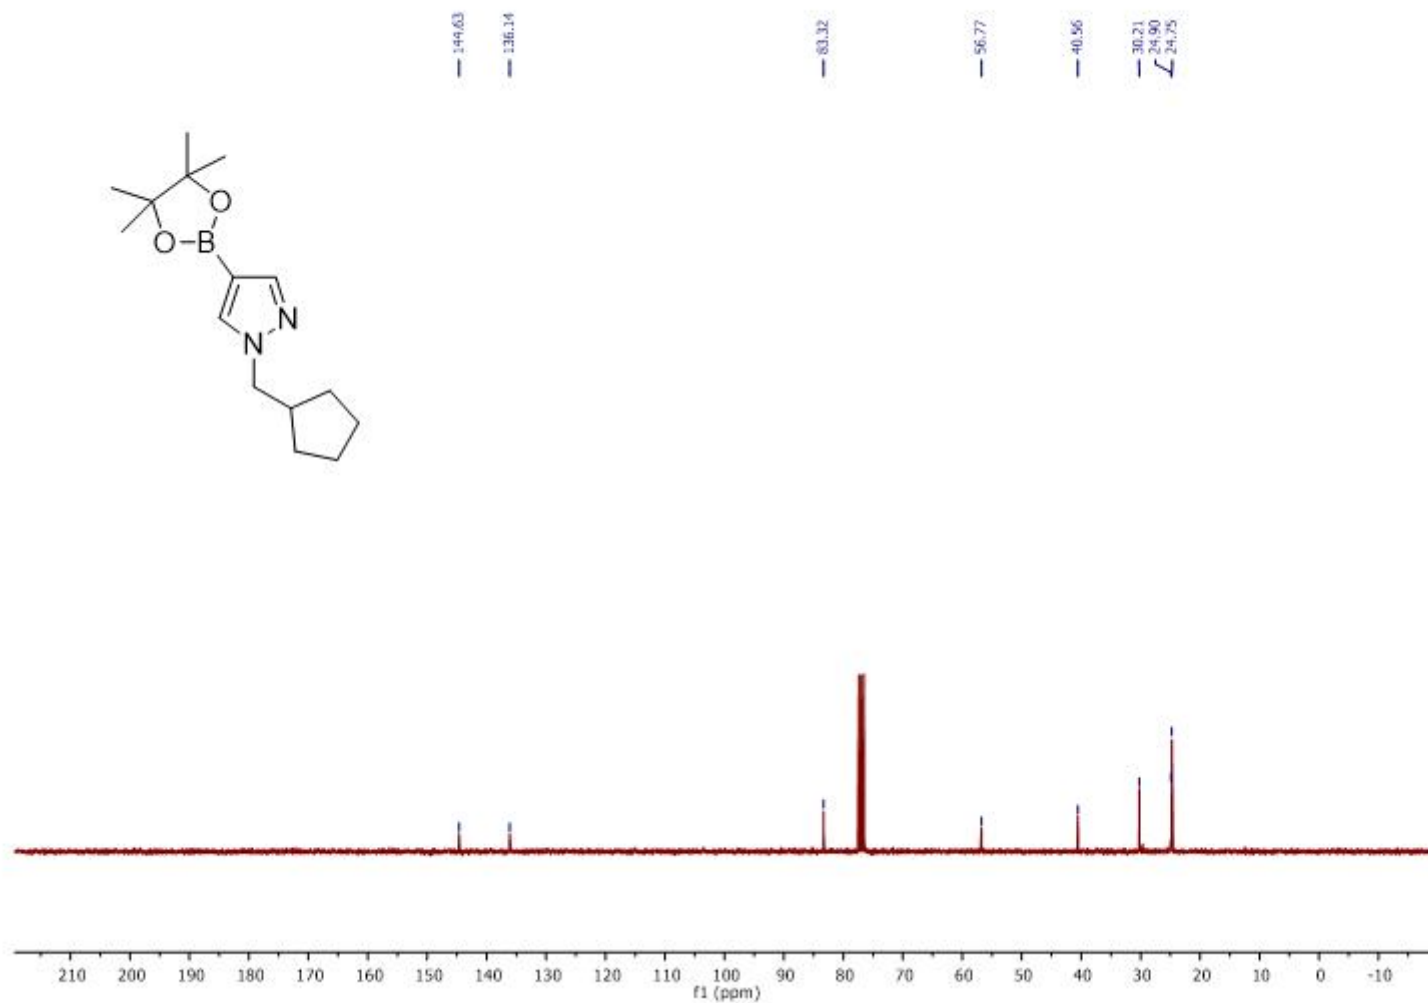

# <sup>1</sup>H spectrum of compound 6a

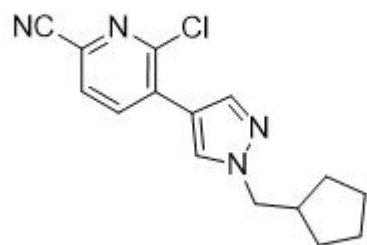

8.01, 7.94, 7.81, 7.87, 7.65, 7.62, 4.12, 4.10, 2.56, 2.53, 2.51, 2.48, 2.46, 2.43, 2.40

A (m)  
2.48

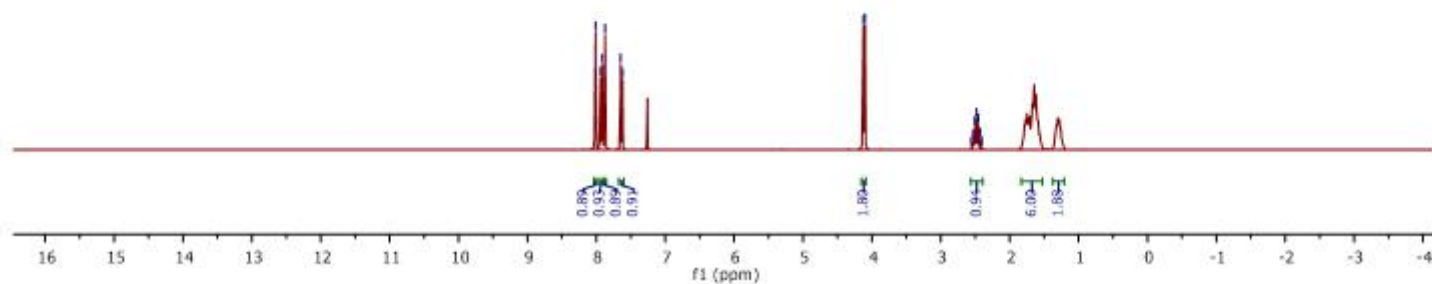

<sup>13</sup>C spectrum of compound **6a**

- 148.94
- 138.83
- 137.30
- 132.81
- 129.84
- 129.57
- 127.26
- 116.14
- 115.83
- 57.58
- 40.63
- 30.25
- 24.96

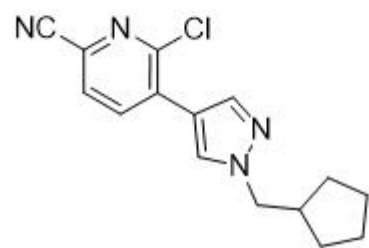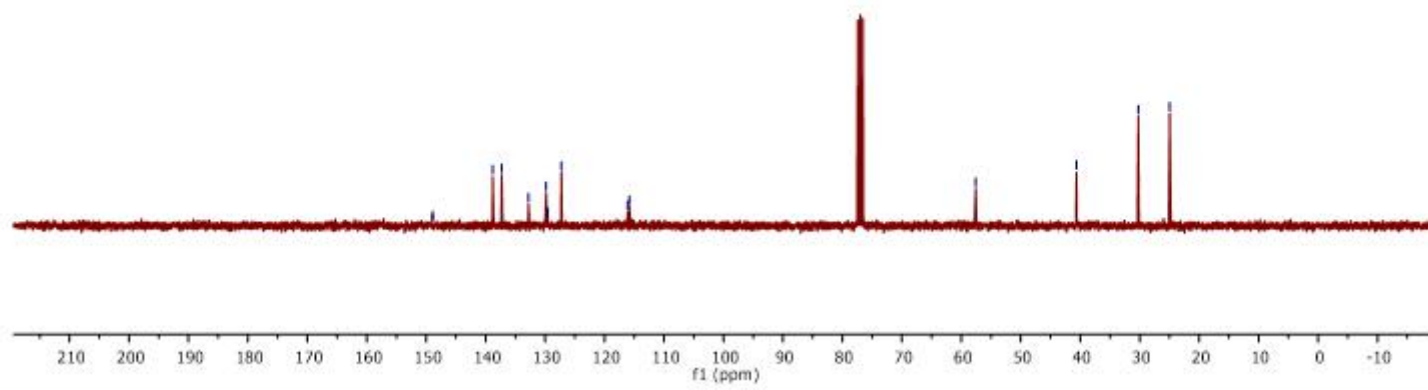

$^1\text{H}$  spectrum of compound **8**

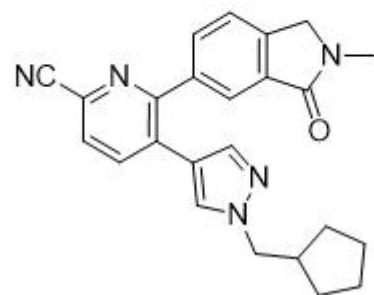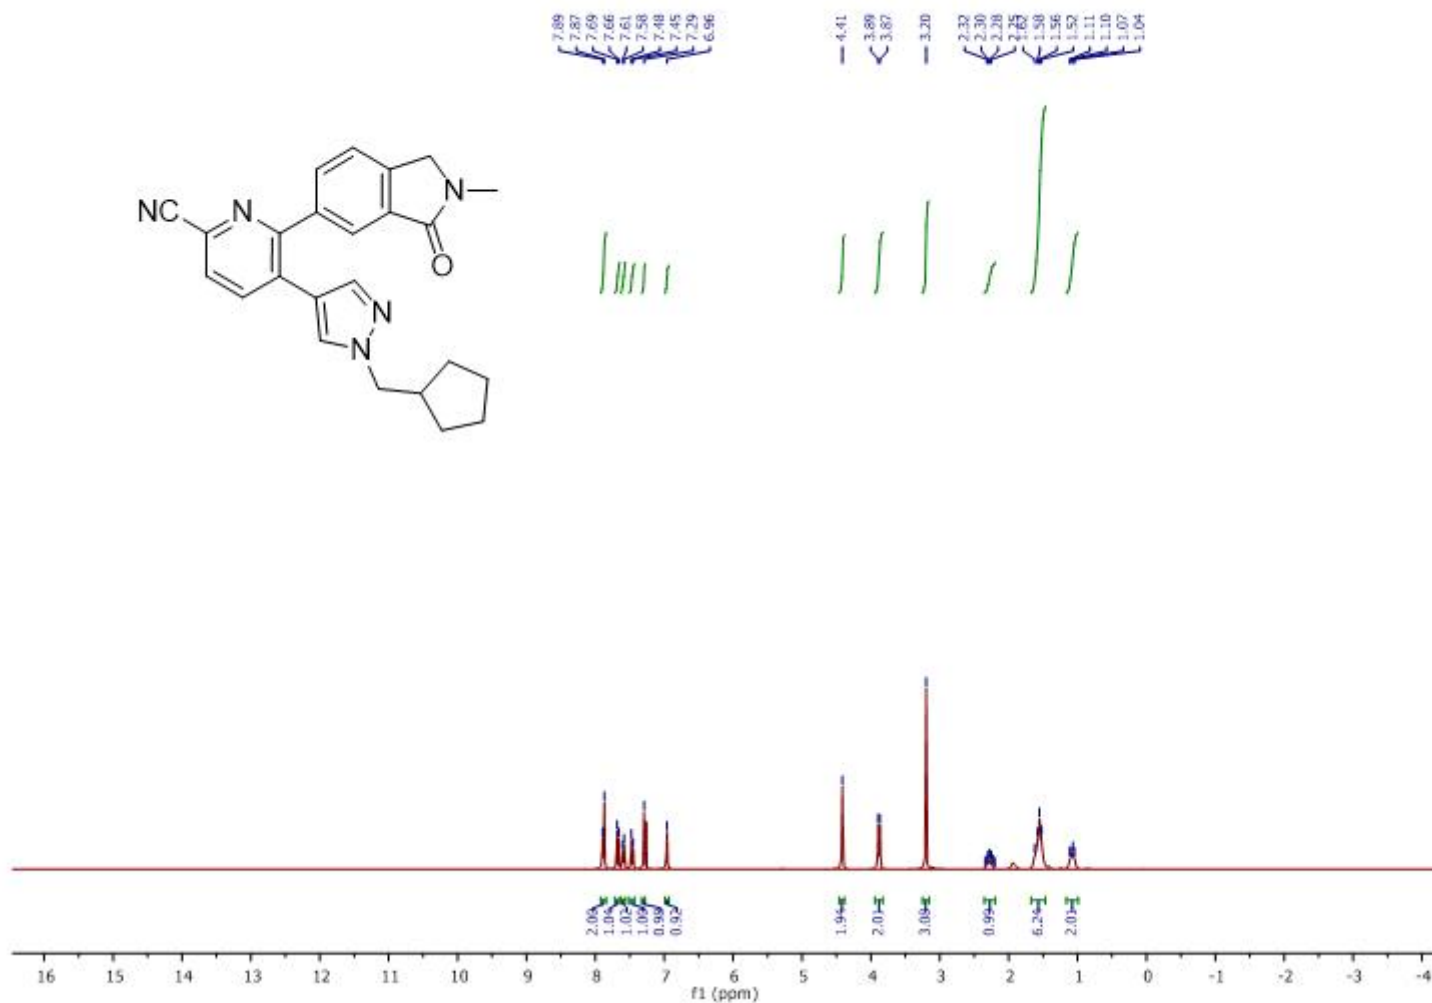

# <sup>13</sup>C spectrum of compound 8

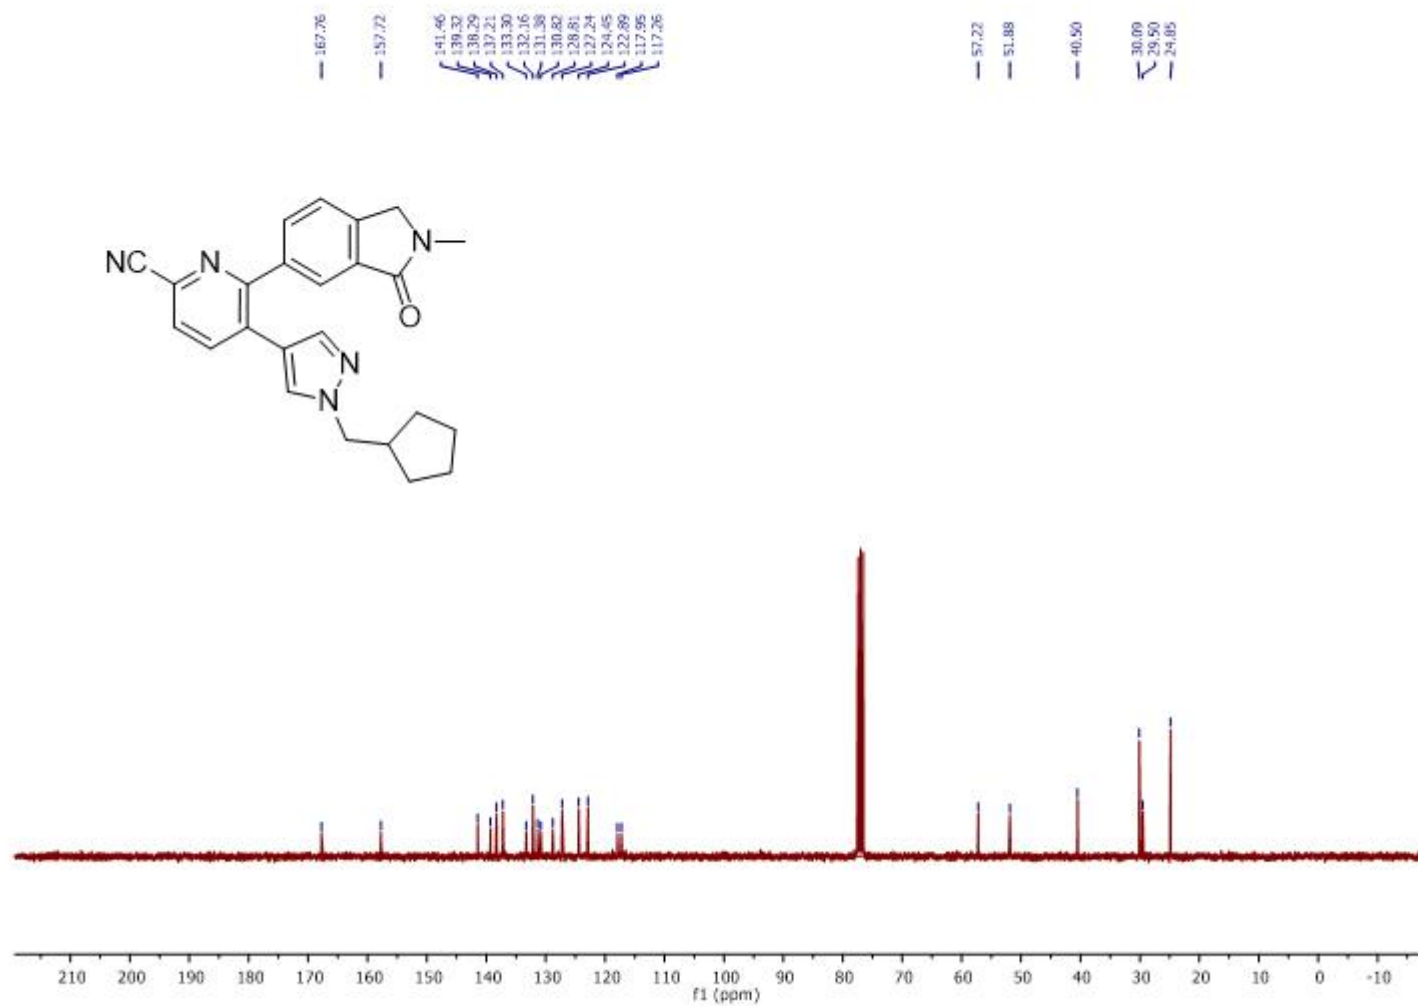



# <sup>1</sup>H spectrum of compound 9

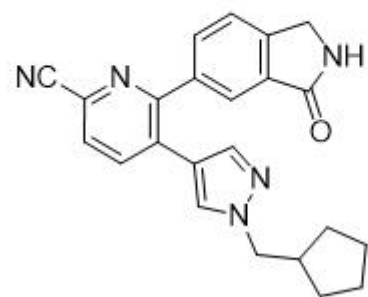

7.93  
7.92  
7.91  
7.88  
7.70  
7.67  
7.65  
7.64  
7.53  
7.50  
7.47  
7.33  
7.26  
6.97

4.51  
3.91  
3.88

2.33  
2.31  
2.29  
2.26  
2.24  
1.63  
1.62  
1.59  
1.57  
1.55  
1.49  
1.12  
1.09  
1.08  
1.06

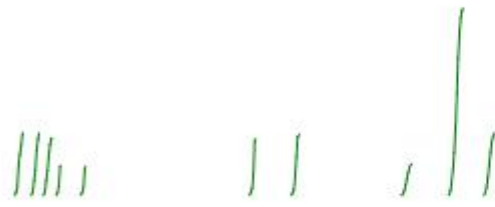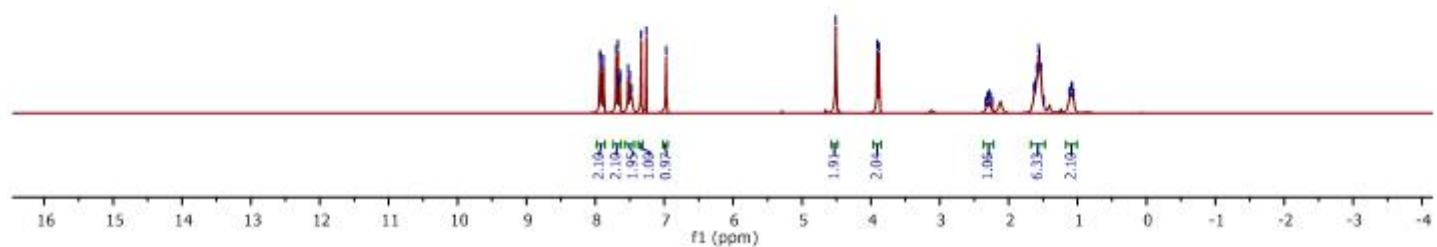

# <sup>13</sup>C spectrum of compound 9

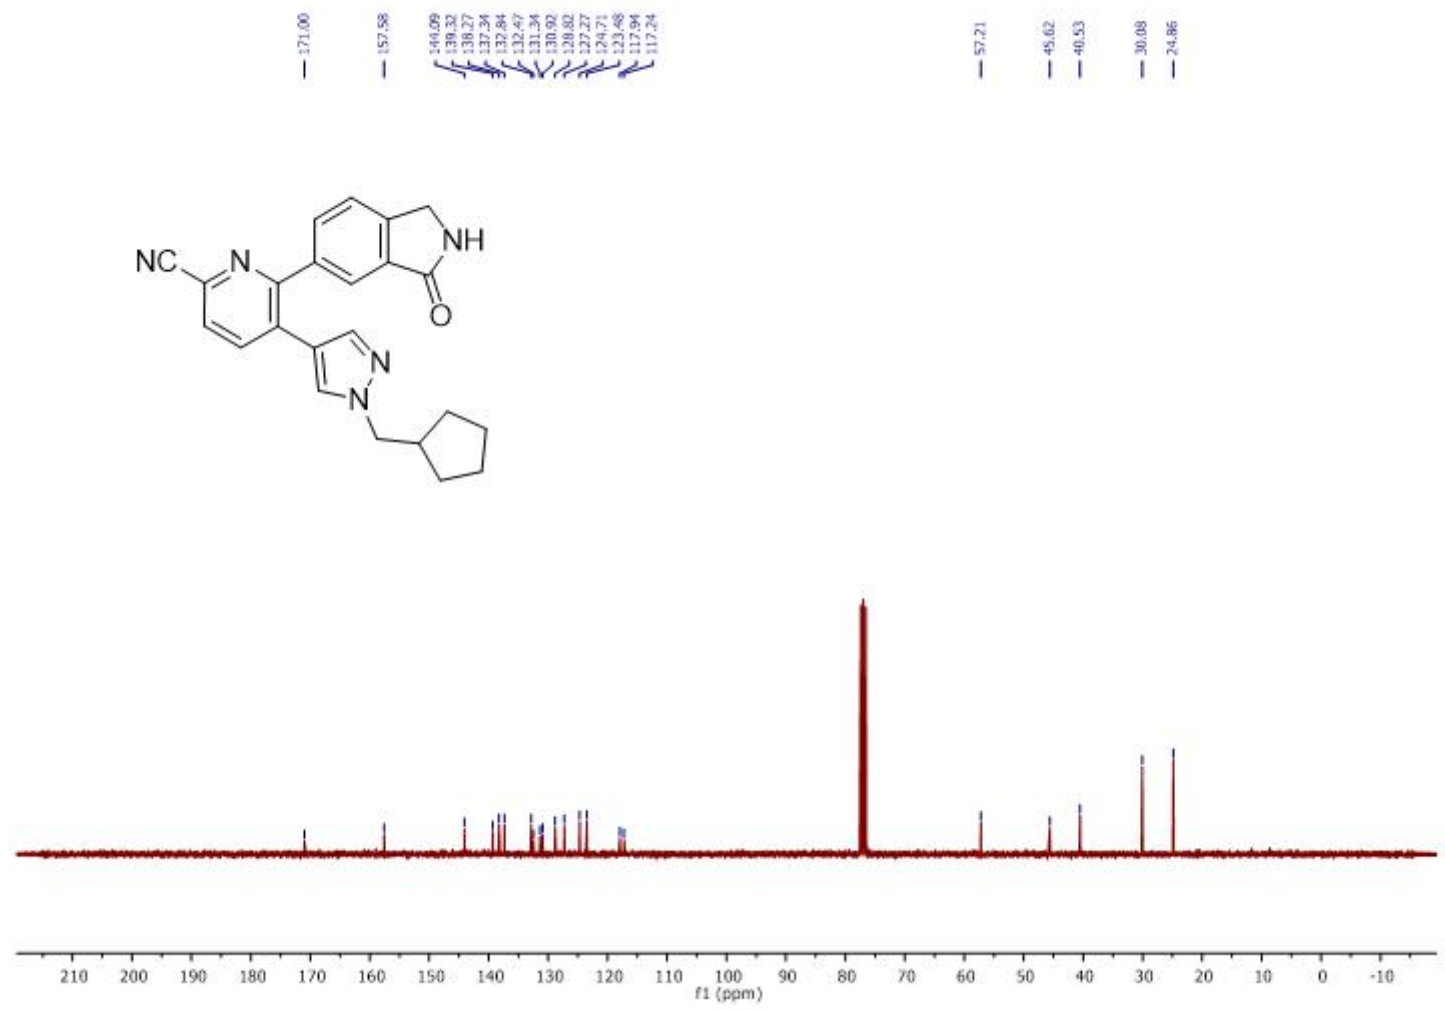

<sup>1</sup>H spectrum of compound **6b**

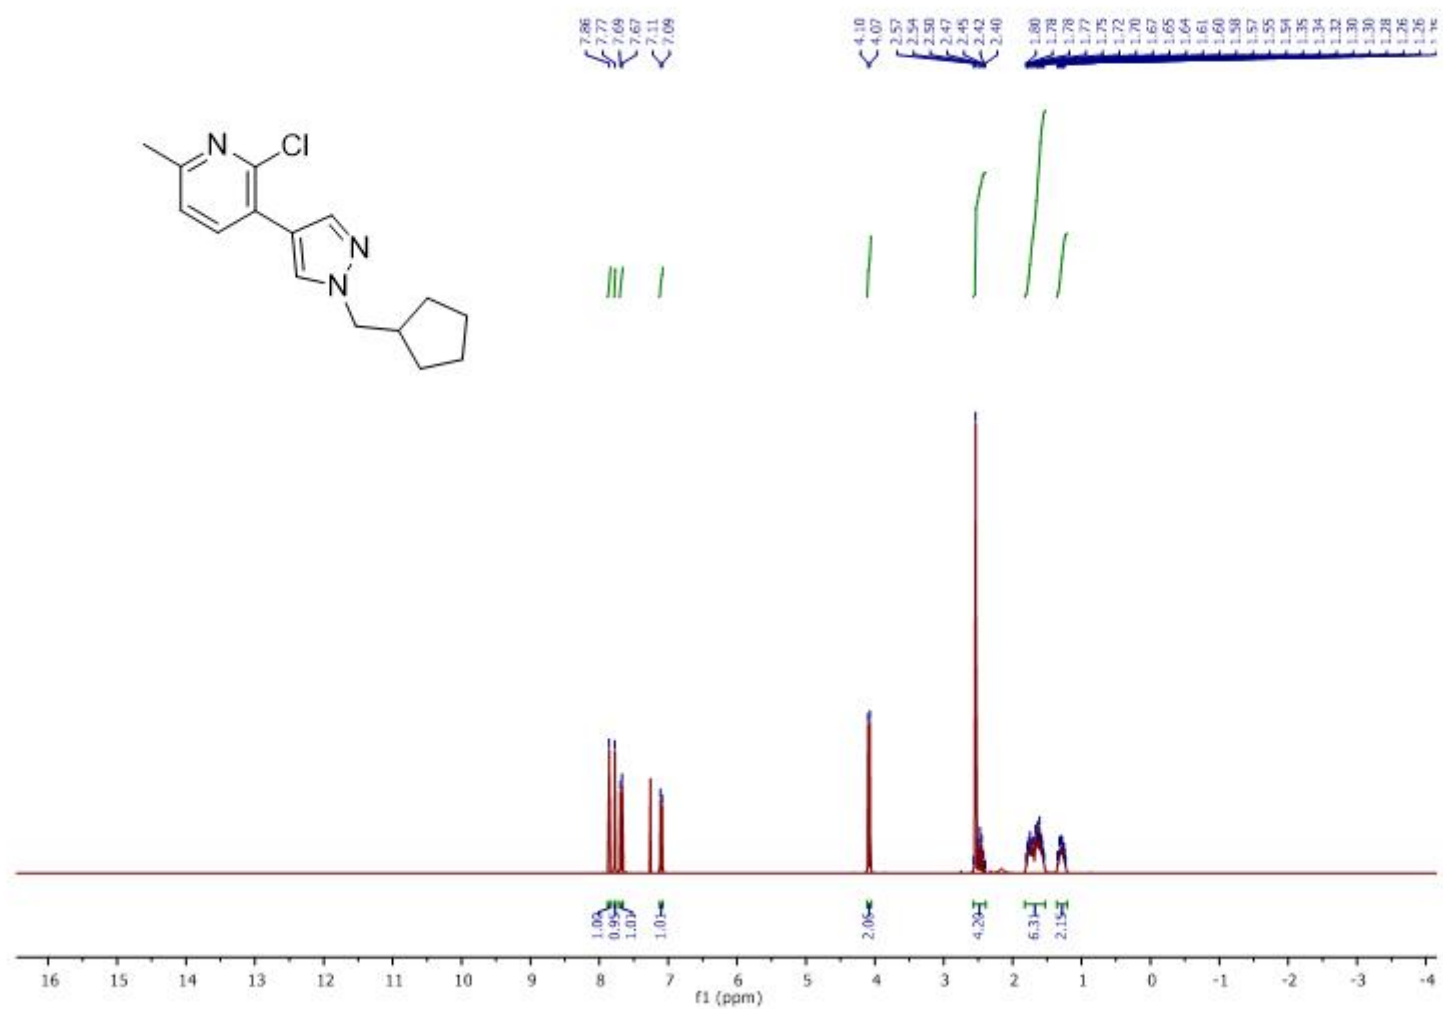

# <sup>13</sup>C spectrum of compound **6b**

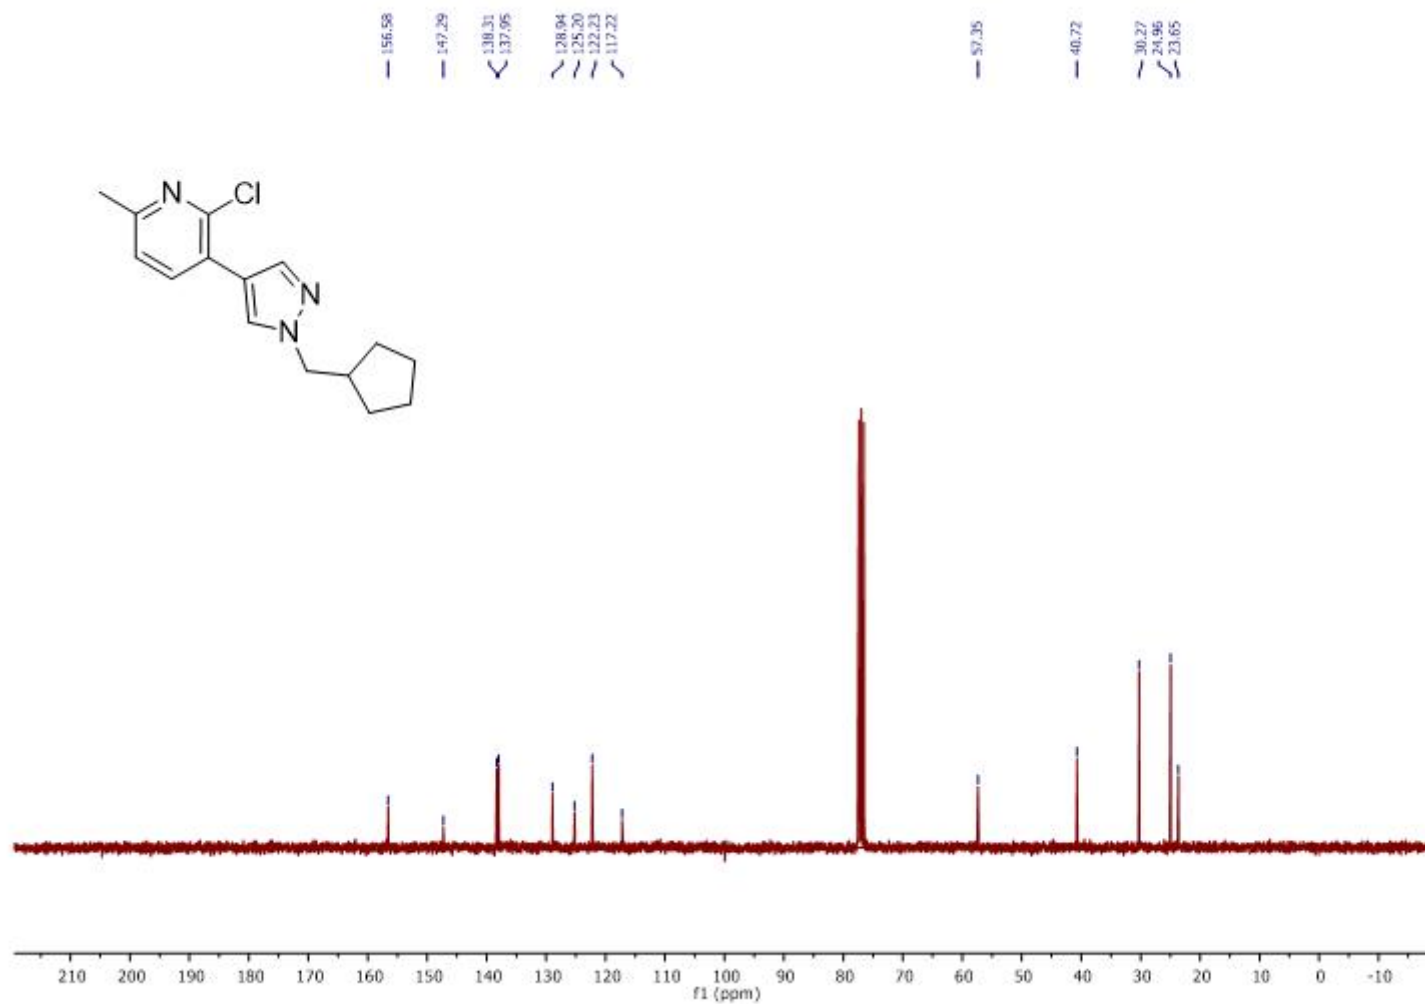

# <sup>1</sup>H spectrum of compound 10

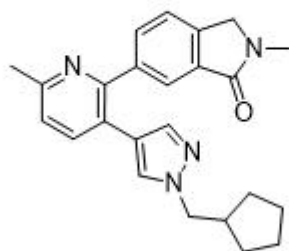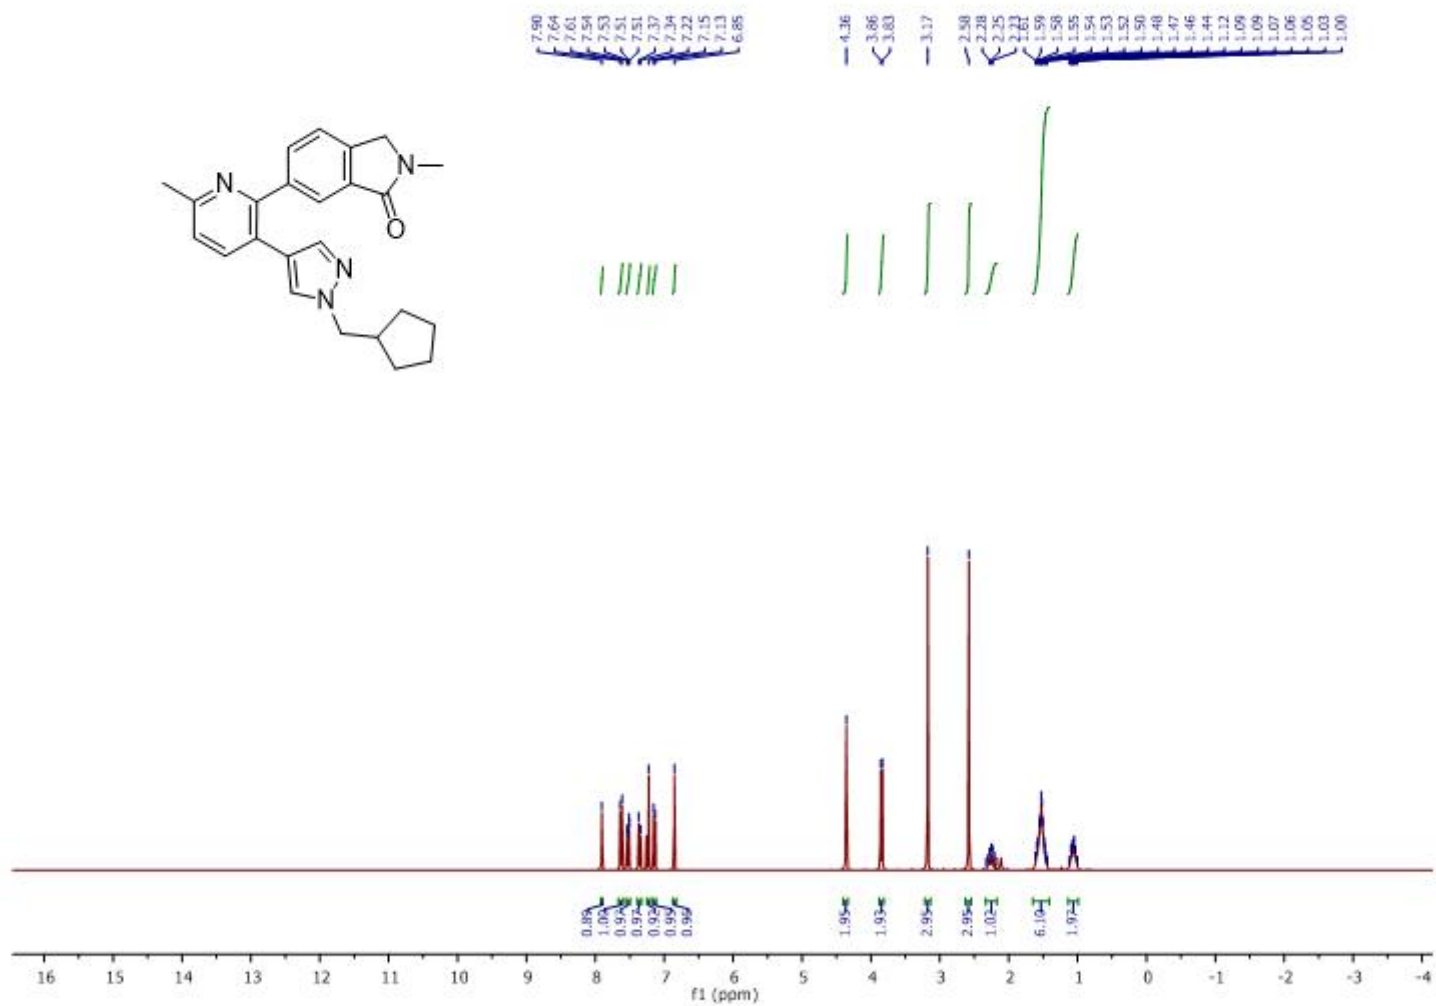

# <sup>13</sup>C spectrum of compound 10

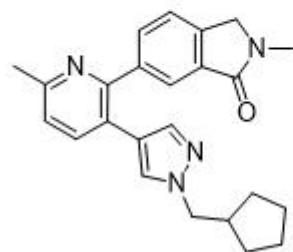

168.22  
156.27  
155.47  
141.39  
140.37  
138.14  
137.31  
133.01  
132.45  
128.14  
124.68  
124.30  
122.30  
122.22  
119.39

56.95  
51.83  
40.60  
30.06  
29.43  
24.85  
24.23

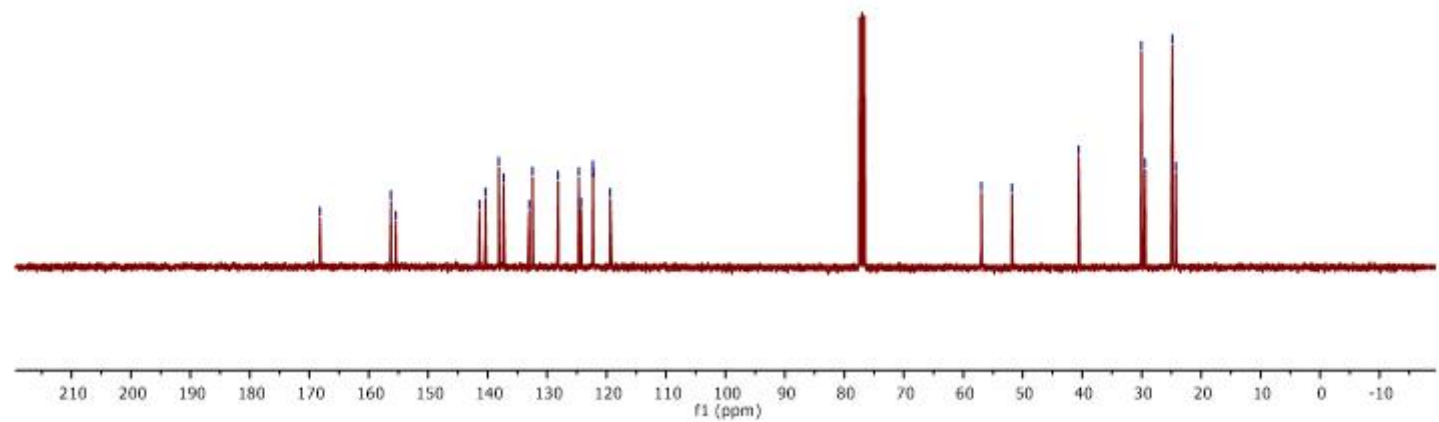

# $^1\text{H}$ spectrum of compound 11

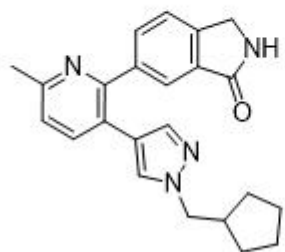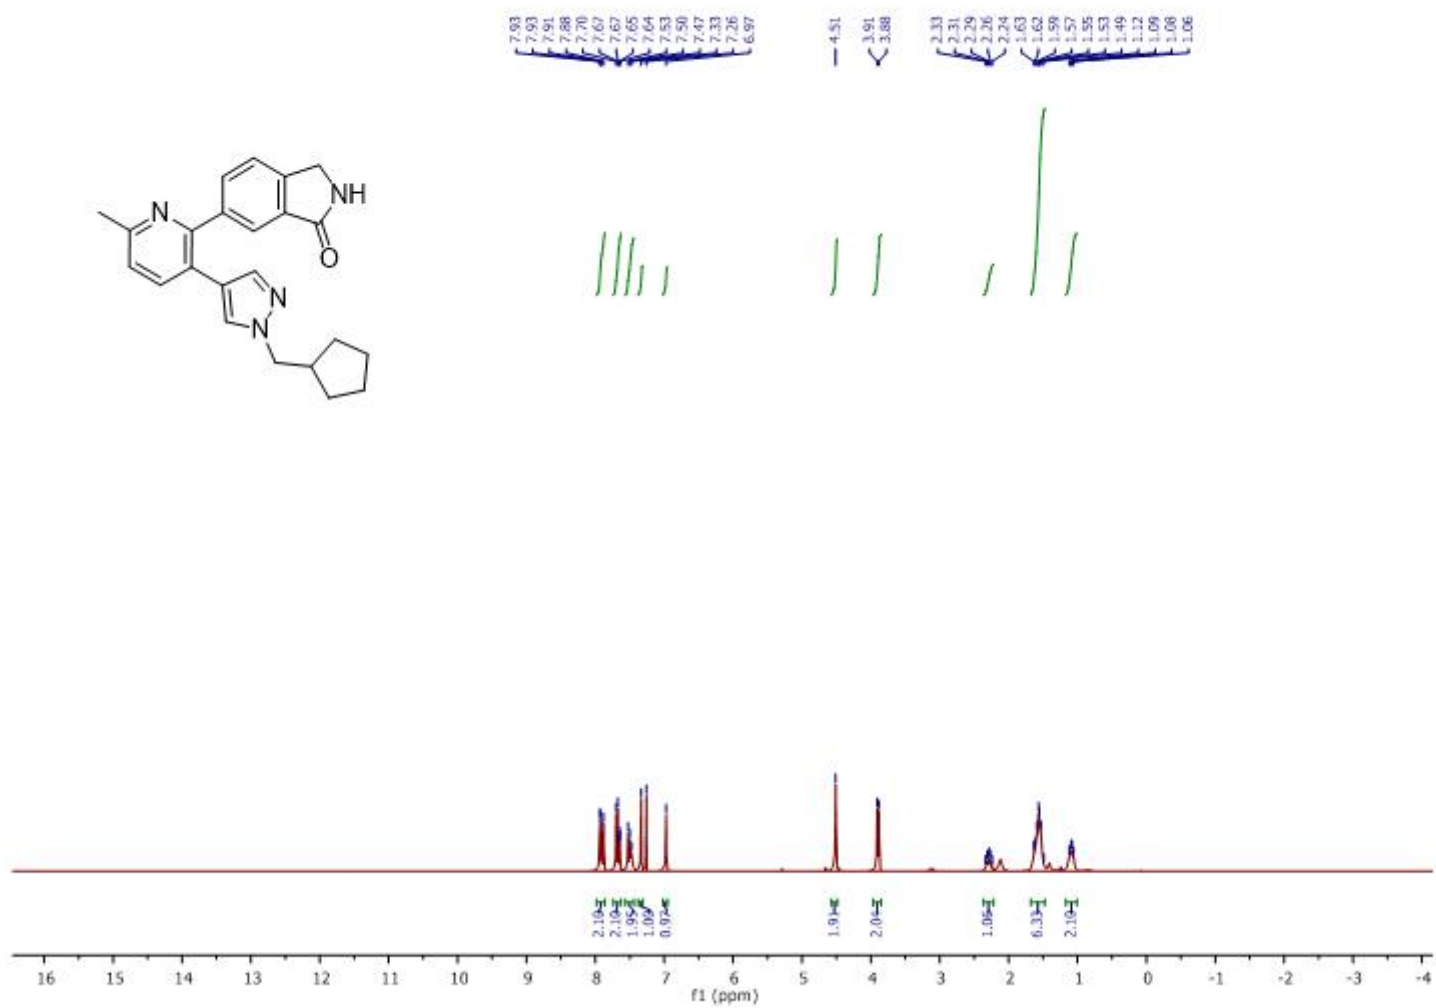

# <sup>13</sup>C spectrum of compound **11**

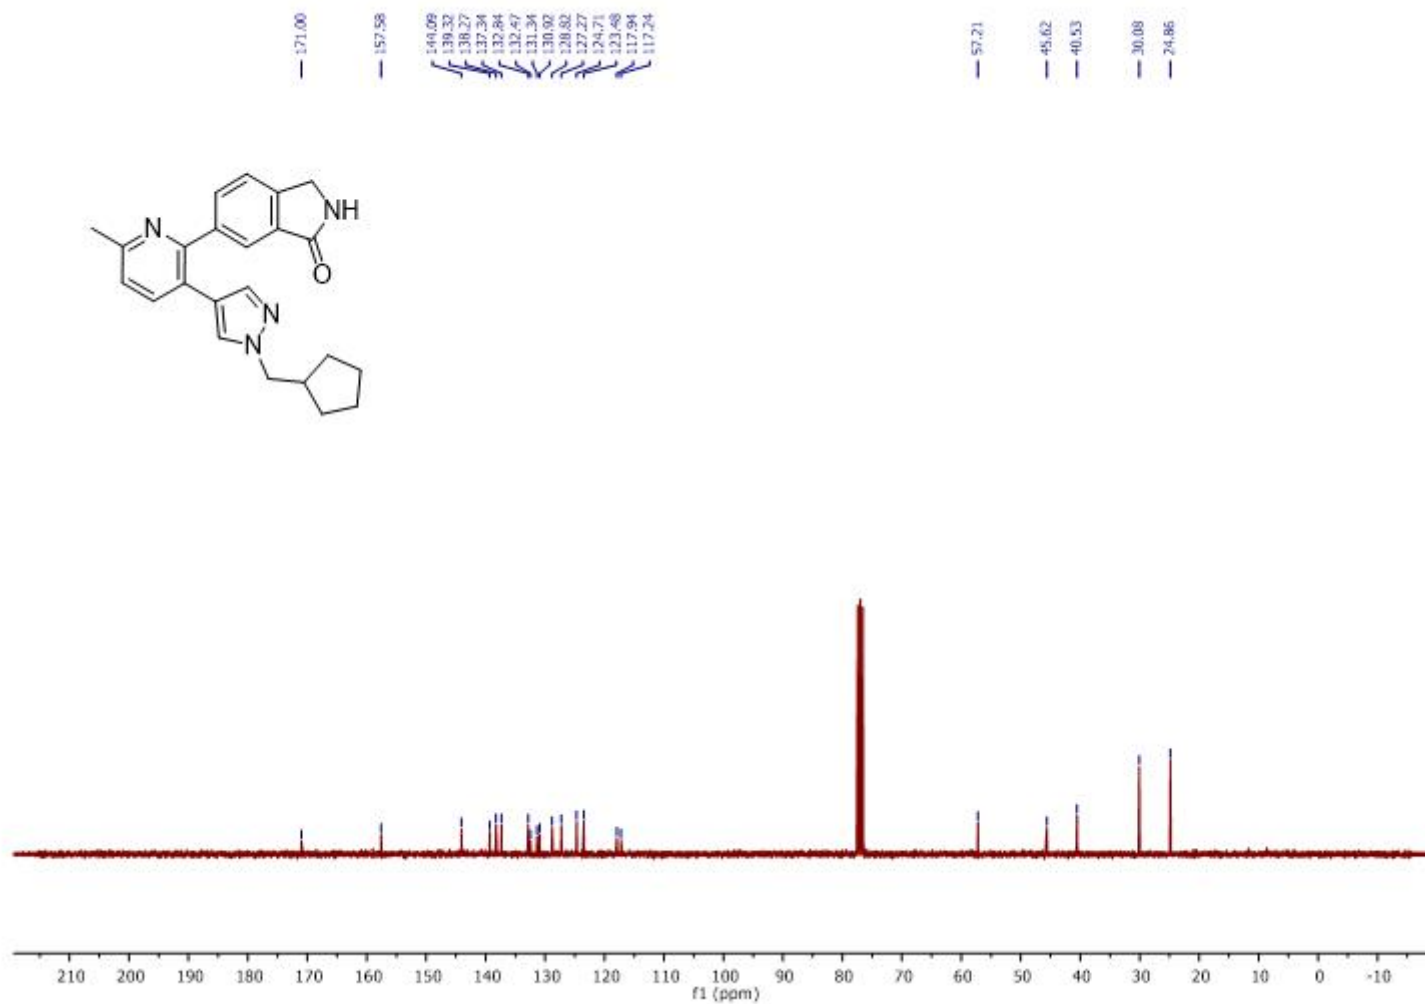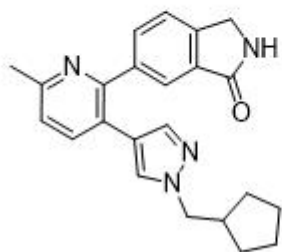



# <sup>1</sup>H spectrum of compound 12

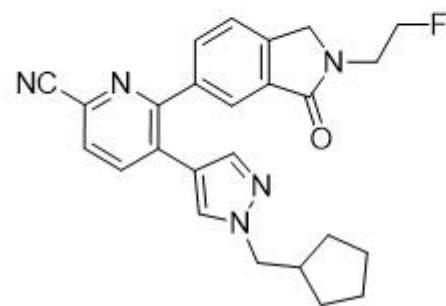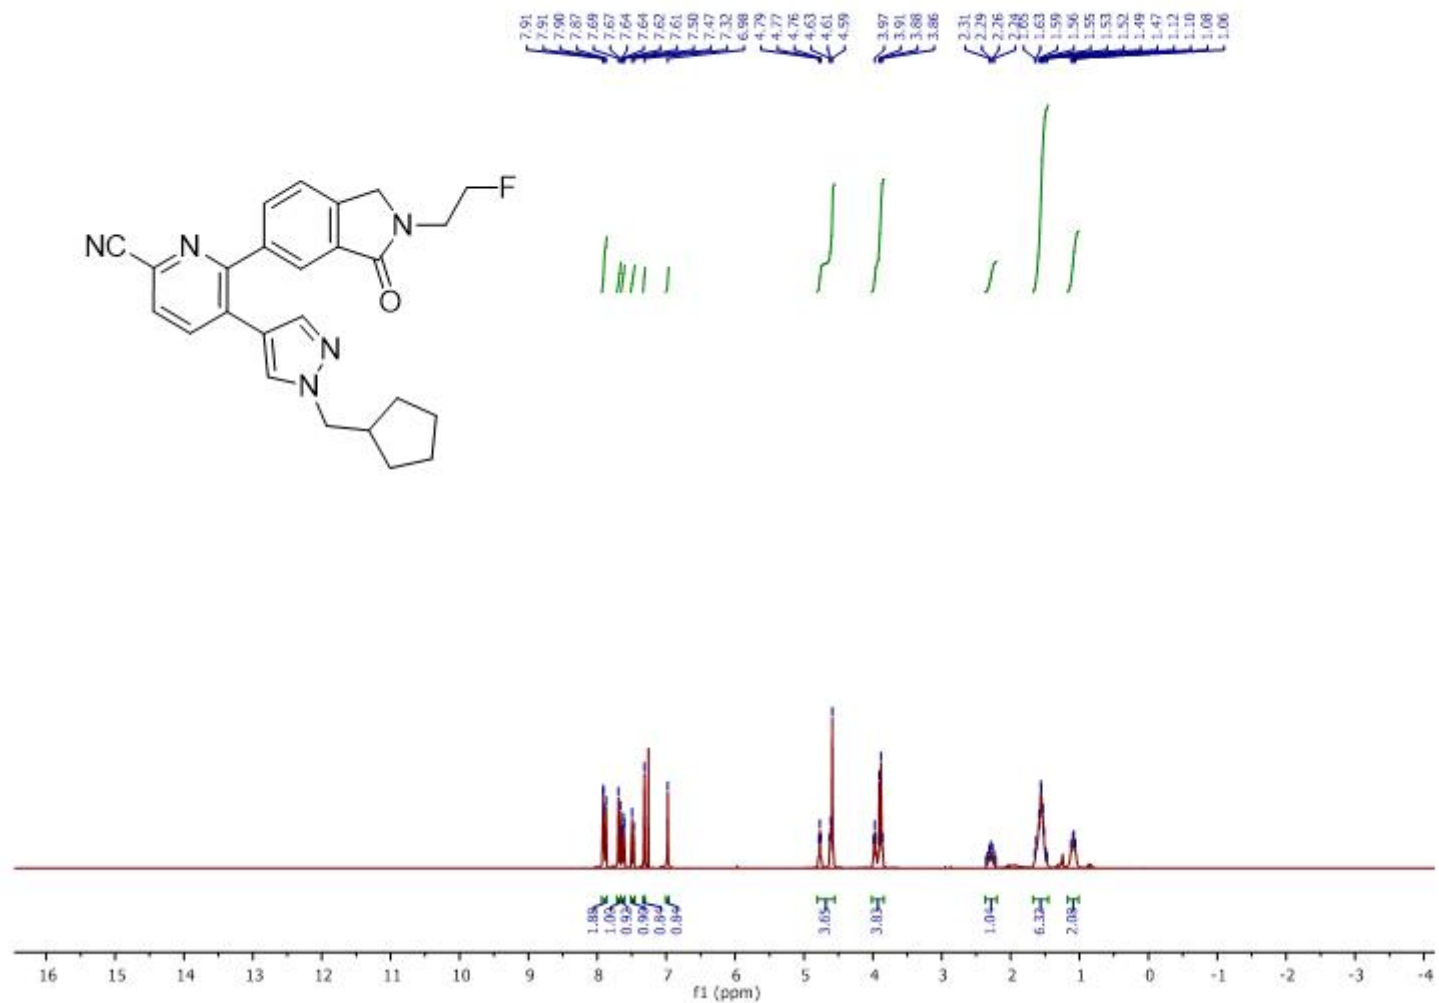

$^{19}\text{F}$  spectrum of compound **12**

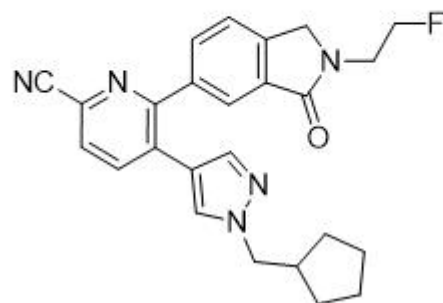

-216.60  
-216.70  
-216.76  
-216.90  
-216.87  
-216.93  
-216.89  
-217.03  
-217.14

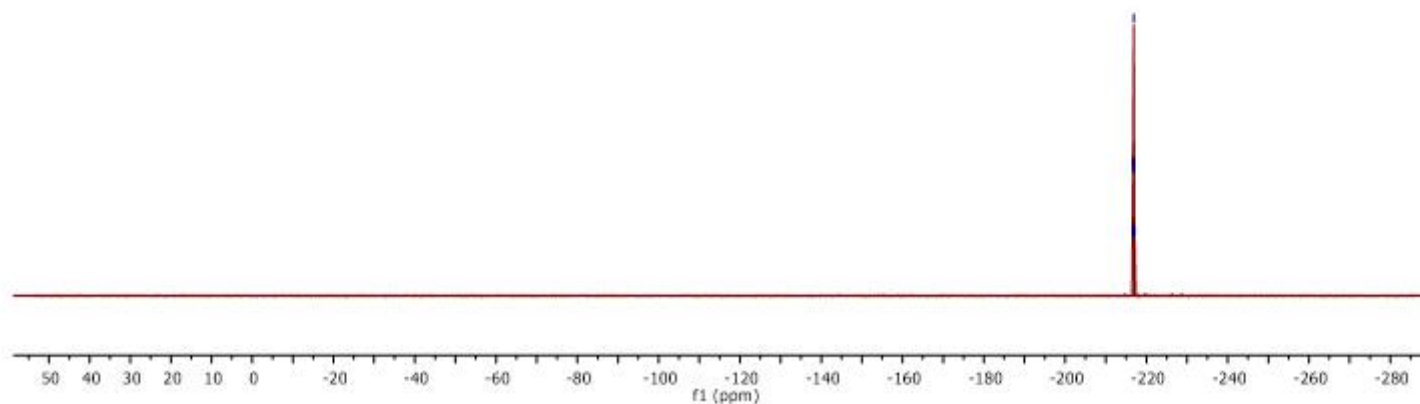

# <sup>13</sup>C spectrum of compound 12

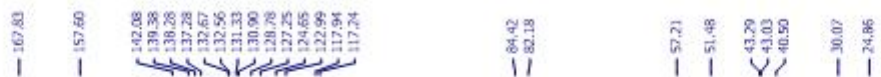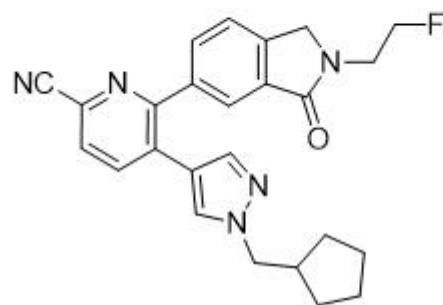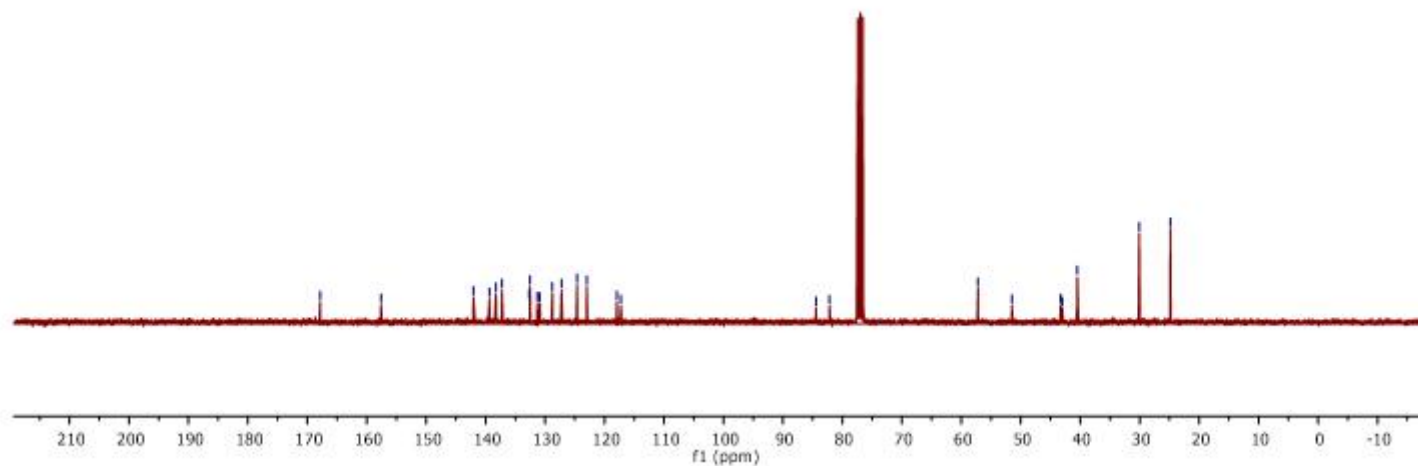

# <sup>1</sup>H spectrum of compound 13

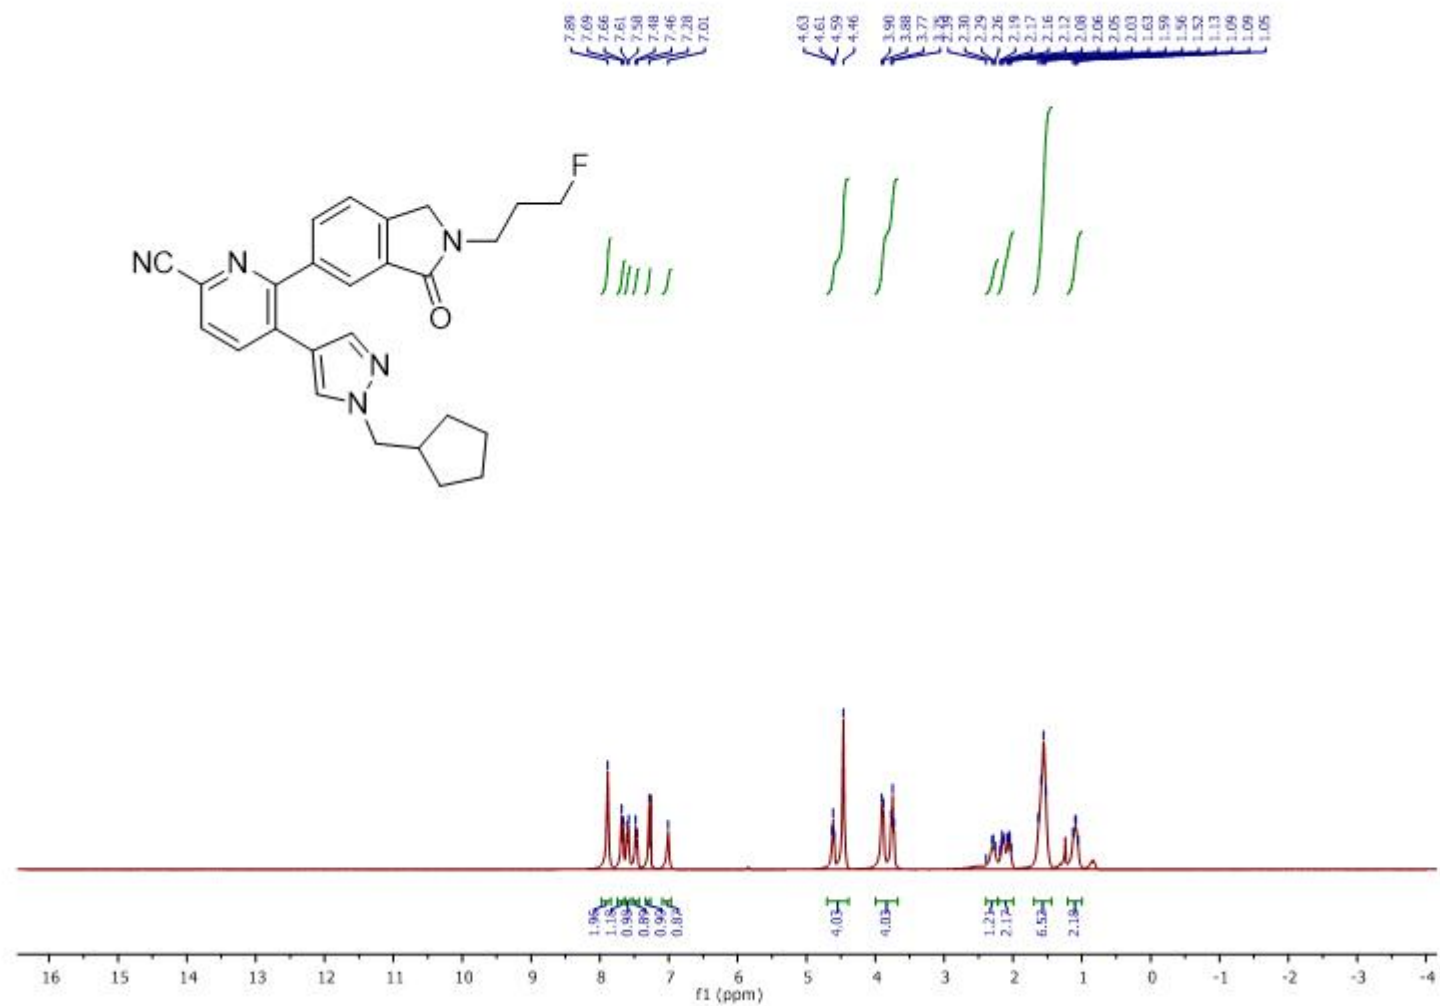

$^{19}\text{F}$  spectrum of compound **13**

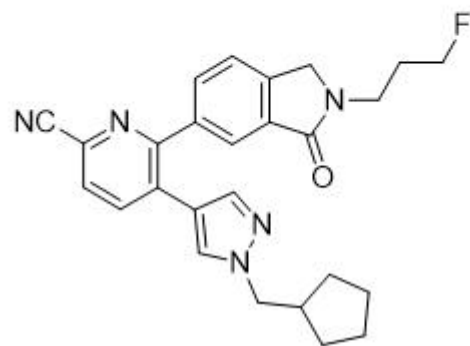

-216.45  
-216.35  
-216.62  
-216.64  
-216.71  
-216.79  
-216.81  
-216.88  
-216.97

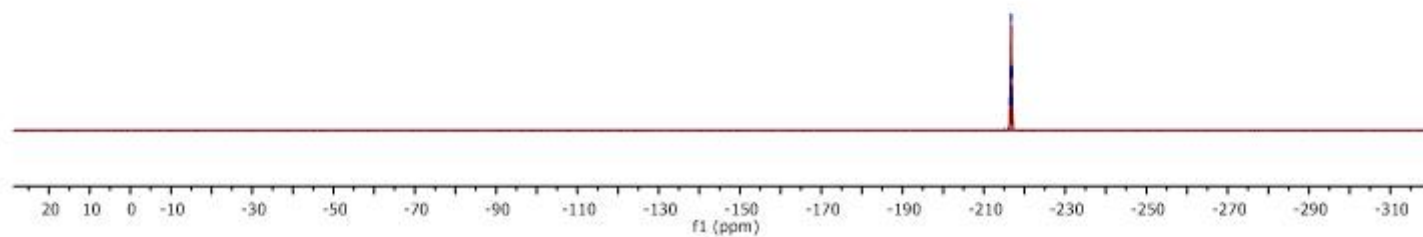

<sup>13</sup>C spectrum of compound **13**

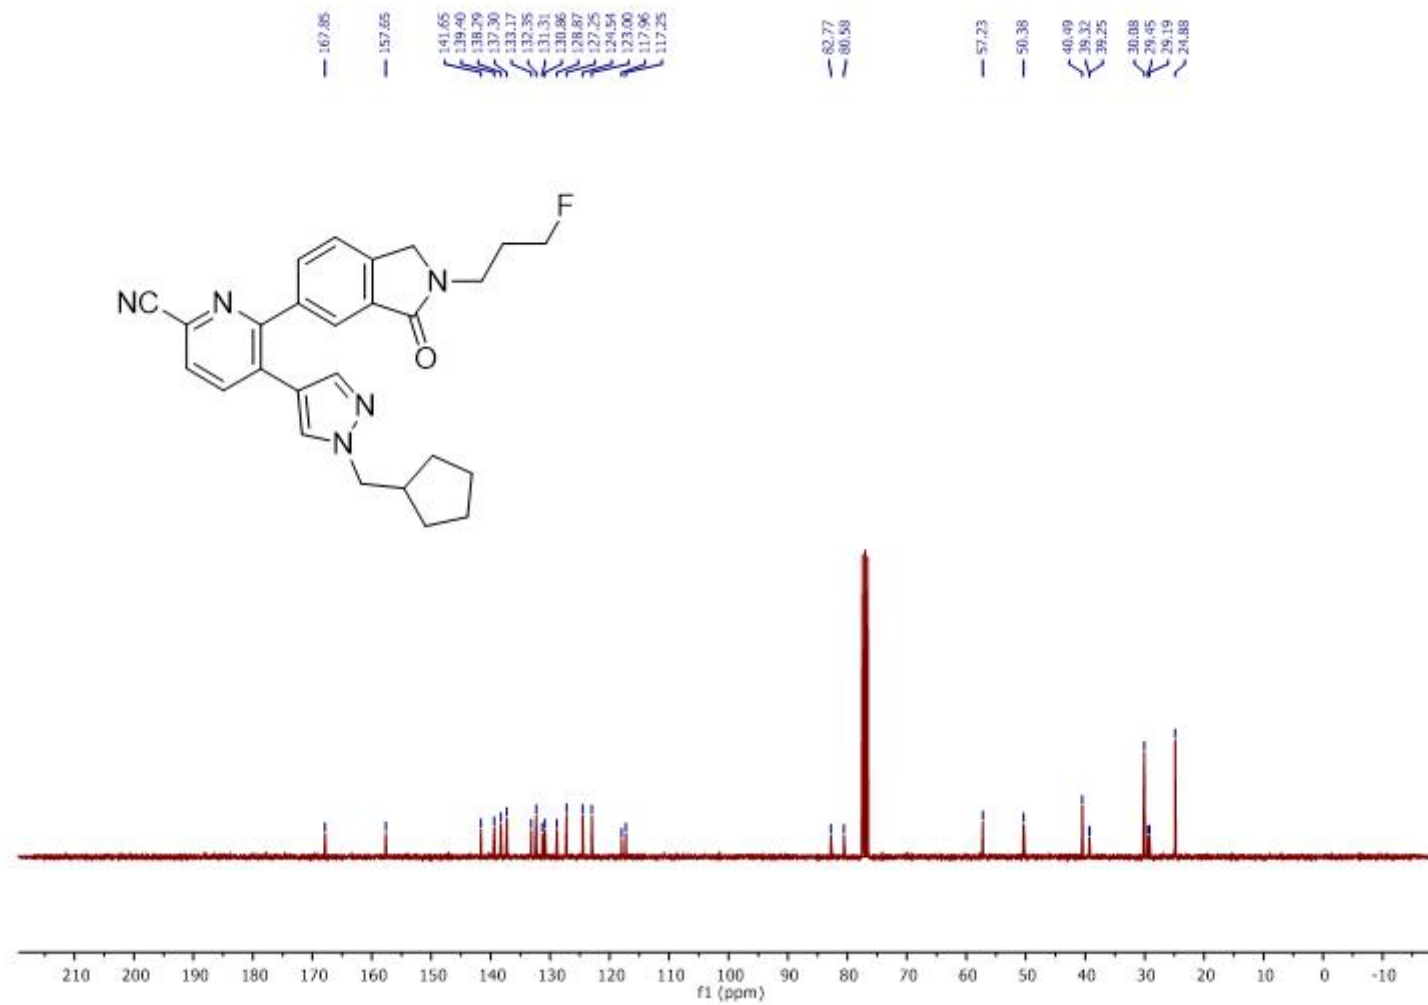

# M1 Receptor

# Supplemental Figure 1

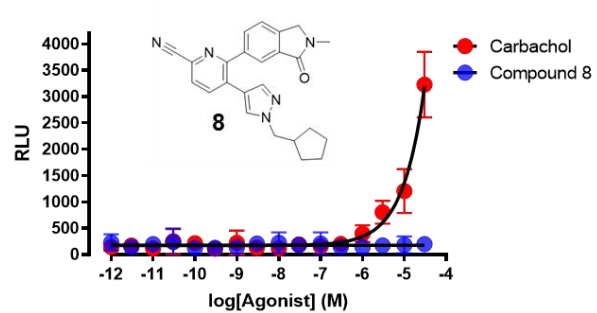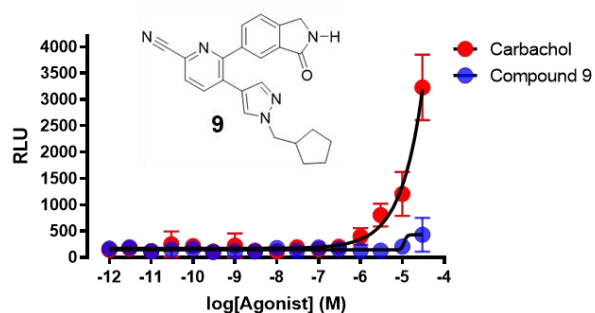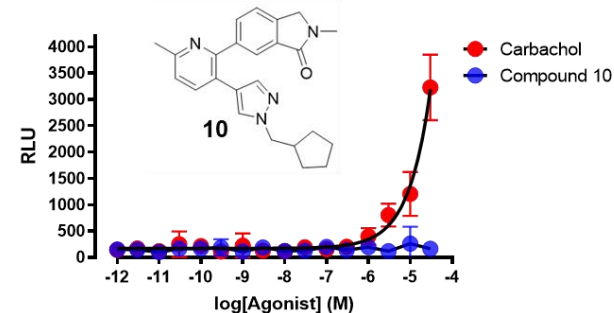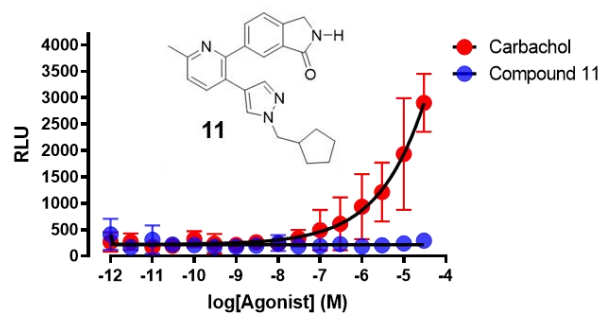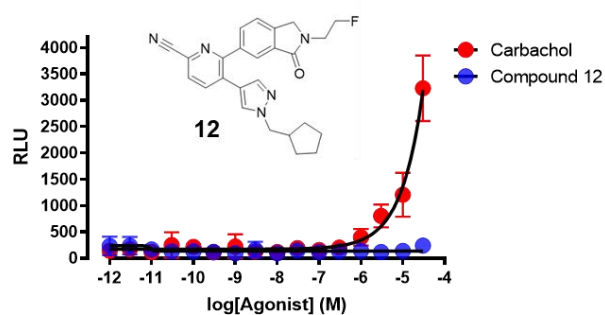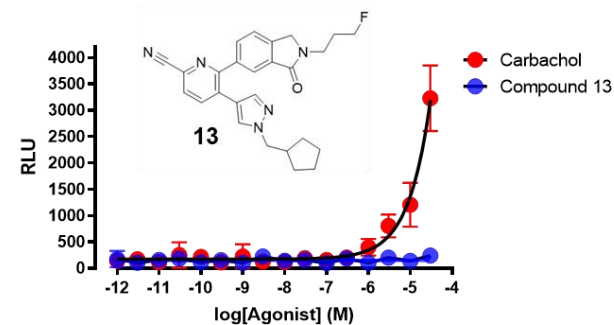

# M2 Receptor

# Supplemental Figure 2

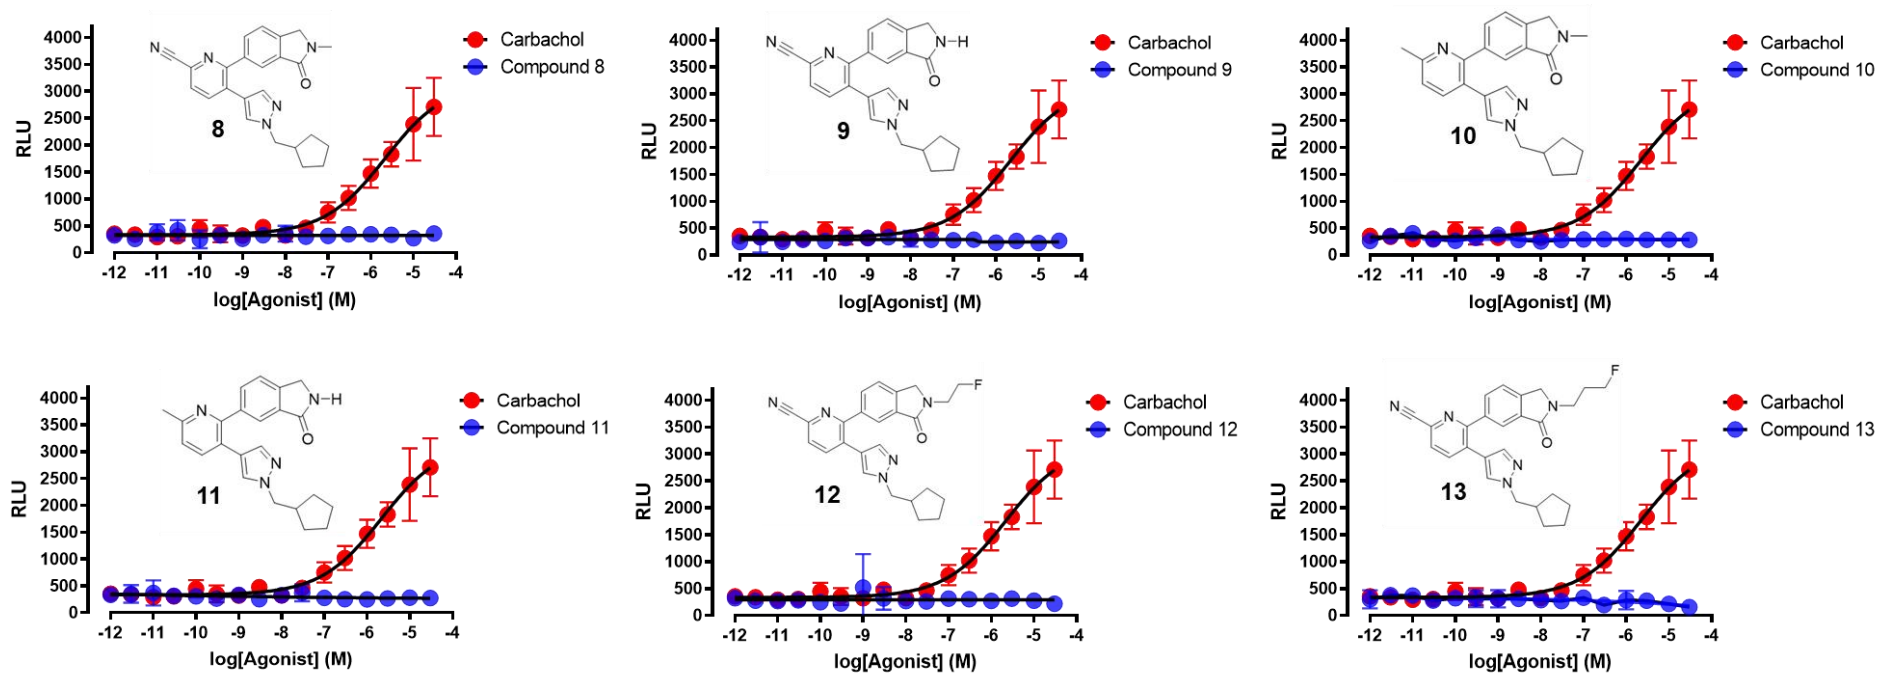



# M3 Receptor

# Supplemental Figure 3

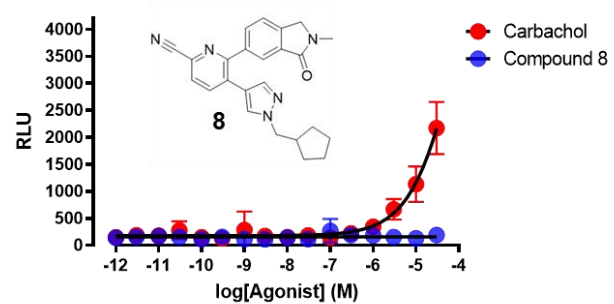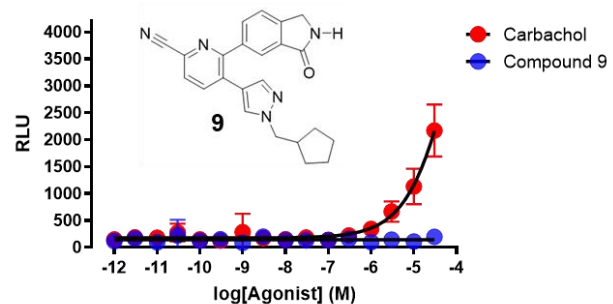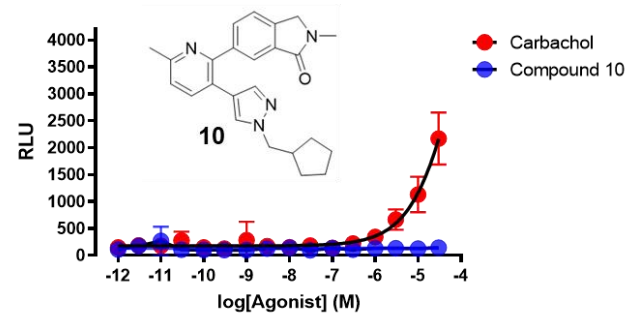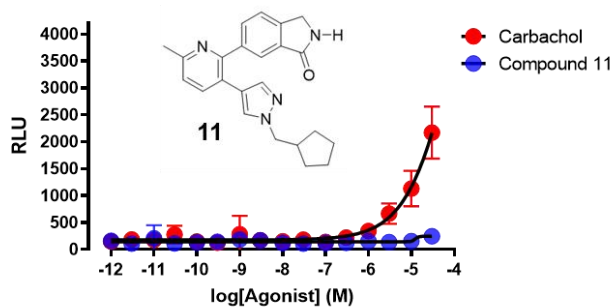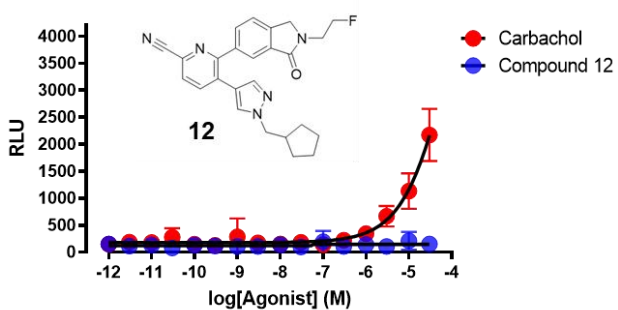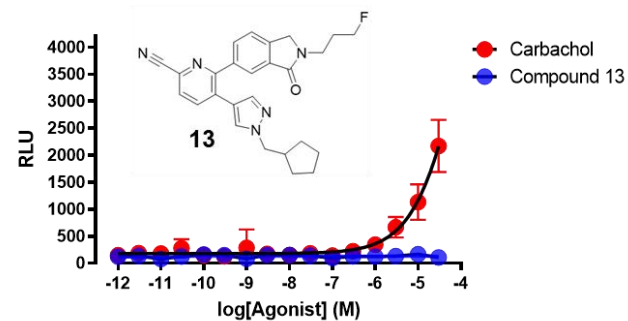

# M5 Receptor

# Supplemental Figure 4

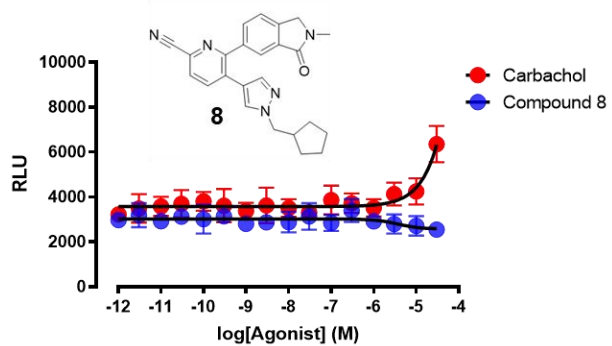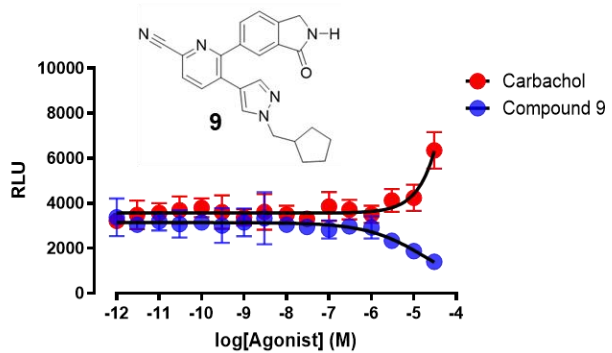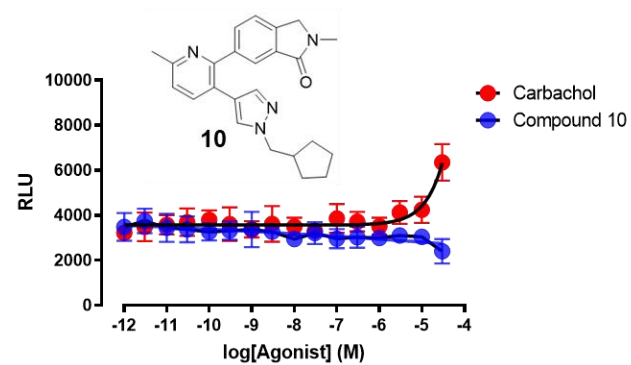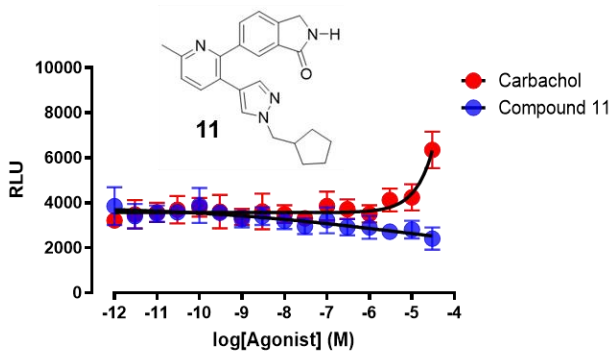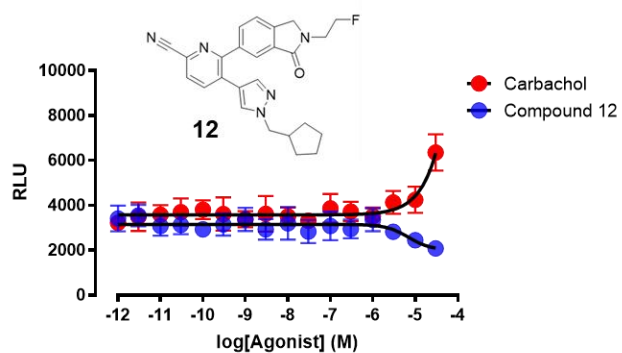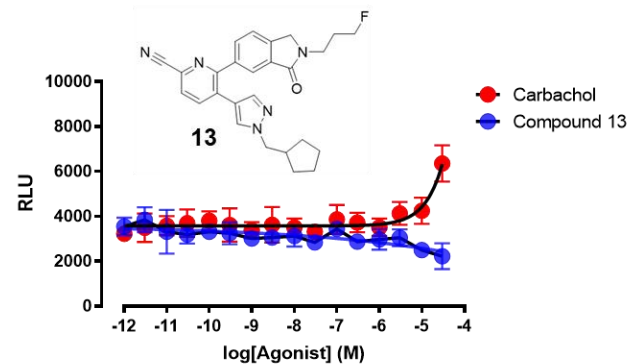

Supplement: mmc1.pdf [file mmc1.pdf]
